# Supplementary material for: Effects of Klebsiella pneumoniae Bacteriophages on IRAK3 Knockdown/Knockout THP-1 Monocyte Cell Lines
Source: MDPI journal article supplement (doi:10.3390/v14112582), 2022-11-21
Supplement: s1 [file s1]

## Effects of *Klebsiella pneumoniae* Bacteriophages on IRAK3 Knockdown/Knockout THP-1 Monocyte Cell Lines

Bryce Dylan Schubert 1,†, Heng Ku 2,†, Mwila Kabwe 1,3,†, Trang Hong Nguyen 1,3, Helen Irving 1,3 and Joseph Tucci 1,3,\*

1 Department of Rural Clinical Sciences, La Trobe Rural Health School, La Trobe University, P.O. Box 199, Bendigo, VIC 3550, Australia

2 Commonwealth Scientific and Industrial Research Organisation, Brisbane, QLD, Australia

3 La Trobe Institute for Molecular Science, La Trobe University, P.O. Box 199, Bendigo, VIC 3550, Australia

\* Correspondence: j.tucci@latrobe.edu.au

† These authors contributed equally to this work.

### Supplementary Tables

Table S1: Bacteriophage KPN7 annotations

| Name                                                         | Start | Finish | Length |
|--------------------------------------------------------------|-------|--------|--------|
| putative terminase large subunit                             | 42493 | 44391  | 1899   |
| putative phage terminase, small subunit                      | 42152 | 42493  | 342    |
| hypothetical protein                                         | 41974 | 42204  | 231    |
| putative Phage tail fiber protein                            | 41018 | 42007  | 990    |
| putative internal virion protein                             | 37182 | 41021  | 3840   |
| Putative baseplate hub subunit/ Lysozyme                     | 34203 | 37139  | 2937   |
| putative DNA ejectosome component, internal virion protein   | 33534 | 34202  | 669    |
| putative phage non-contractile tail tubular protein          | 31138 | 33534  | 2397   |
| putative phage non-contractile tail tubular protein          | 30410 | 31150  | 741    |
| hypothetical protein                                         | 30301 | 30441  | 141    |
| putative Phage major capsid protein                          | 29182 | 30273  | 1092   |
| putative phage capsid assembly scaffolding protein           | 28255 | 29106  | 852    |
| head-to-tail connector protein                               | 26687 | 28255  | 1569   |
| hypothetical protein                                         | 26479 | 26685  | 207    |
| putative GNAT family N-acetyltransferase                     | 25979 | 26470  | 492    |
| hypothetical protein                                         | 25836 | 26012  | 177    |
| hypothetical protein                                         | 25577 | 25852  | 276    |
| putative ATP-dependent DNA ligase                            | 24697 | 25668  | 972    |
| hypothetical protein                                         | 24506 | 24700  | 195    |
| hypothetical protein                                         | 24078 | 24509  | 432    |
| putative metallophosphoesterase                              | 22954 | 23961  | 1008   |
| putative HNH endonuclease motif                              | 22552 | 22953  | 402    |
| putative exonuclease                                         | 21440 | 22567  | 1128   |
| hypothetical protein                                         | 21327 | 21650  | 324    |
| hypothetical protein                                         | 20806 | 21258  | 453    |
| hypothetical protein                                         | 20375 | 20746  | 372    |
| hypothetical protein                                         | 19866 | 20084  | 219    |
| hypothetical protein                                         | 19060 | 19866  | 807    |
| hypothetical protein                                         | 18508 | 18885  | 378    |
| hypothetical protein                                         | 17923 | 18456  | 534    |
| hypothetical protein                                         | 17630 | 17851  | 222    |
| putative DNA-directed DNA polymerase                         | 14934 | 17618  | 2685   |
| hypothetical protein                                         | 14628 | 14927  | 300    |
| hypothetical protein                                         | 14495 | 14722  | 228    |
| hypothetical protein                                         | 13794 | 14498  | 705    |
| putative primase/helicase protein                            | 11712 | 13730  | 2019   |
| hypothetical protein                                         | 11539 | 11727  | 189    |
| putative DNA-directed RNA polymerase                         | 8661  | 11297  | 2637   |
| hypothetical protein                                         | 8282  | 8659   | 378    |
| hypothetical protein                                         | 7351  | 8253   | 903    |
| putative restriction-modification evasion, mimics B-form DNA | 6817  | 7152   | 336    |
| hypothetical protein                                         | 6469  | 6657   | 189    |

|                      |      |      |      |
|----------------------|------|------|------|
| hypothetical protein | 6305 | 6505 | 201  |
| hypothetical protein | 6153 | 6308 | 156  |
| hypothetical protein | 5271 | 5678 | 408  |
| hypothetical protein | 4528 | 4653 | 126  |
| hypothetical protein | 3689 | 4411 | 723  |
| hypothetical protein | 2442 | 3722 | 1281 |
| hypothetical protein | 2179 | 2397 | 219  |
| hypothetical protein | 1931 | 2146 | 216  |
| hypothetical protein | 1777 | 2052 | 276  |
| hypothetical protein | 1698 | 1862 | 165  |
| hypothetical protein | 1597 | 1719 | 123  |
| putative endolysin   | 1257 | 1604 | 348  |
| hypothetical protein | 708  | 1244 | 537  |
| hypothetical protein | 431  | 697  | 267  |
| hypothetical protein | 151  | 417  | 267  |

Table S2: Bacteriophage KPN8 annotations

| Name                                     | Start  | Finish | Length |
|------------------------------------------|--------|--------|--------|
| hypothetical protein                     | 252695 | 255610 | 2916   |
| hypothetical protein                     | 251973 | 252653 | 681    |
| hypothetical protein                     | 250471 | 251976 | 1506   |
| hypothetical protein                     | 250080 | 250478 | 399    |
| hypothetical protein                     | 248745 | 250070 | 1326   |
| putative ribonuclease                    | 246945 | 248666 | 1722   |
| hypothetical protein                     | 246319 | 246900 | 582    |
| hypothetical protein                     | 245909 | 246313 | 405    |
| putative ZipA-like cell division protein | 244260 | 245876 | 1617   |
| hypothetical protein                     | 243502 | 244242 | 741    |
| hypothetical protein                     | 242607 | 243491 | 885    |
| hypothetical protein                     | 241322 | 242614 | 1293   |
| hypothetical protein                     | 240775 | 241266 | 492    |
| hypothetical protein                     | 240449 | 240820 | 372    |
| hypothetical protein                     | 240057 | 240455 | 399    |
| hypothetical protein                     | 239573 | 240079 | 507    |
| putative UvsW-like helicase              | 237987 | 239537 | 1551   |
| hypothetical protein                     | 235991 | 237970 | 1980   |
| putative DNA-directed RNA polymerase     | 233896 | 236007 | 2112   |
| hypothetical protein                     | 233112 | 233462 | 351    |
| hypothetical protein                     | 231664 | 233055 | 1392   |
| hypothetical protein                     | 230176 | 231648 | 1473   |
| hypothetical protein                     | 228556 | 230142 | 1587   |
| hypothetical protein                     | 227694 | 228437 | 744    |
| hypothetical protein                     | 226853 | 227653 | 801    |
| putative metallo-dependent phosphatase   | 225714 | 226853 | 1140   |
| hypothetical protein                     | 224959 | 225720 | 762    |
| hypothetical protein                     | 224549 | 224956 | 408    |
| hypothetical protein                     | 224368 | 224493 | 126    |
| hypothetical protein                     | 223928 | 224290 | 363    |
| hypothetical protein                     | 223524 | 223928 | 405    |
| hypothetical protein                     | 222882 | 223517 | 636    |
| hypothetical protein                     | 221276 | 222895 | 1620   |
| hypothetical protein                     | 219192 | 221204 | 2013   |
| hypothetical protein                     | 217821 | 218933 | 1113   |
| hypothetical protein                     | 215673 | 217775 | 2103   |

|                                                     |        |        |      |
|-----------------------------------------------------|--------|--------|------|
| hypothetical protein                                | 215158 | 215571 | 414  |
| hypothetical protein                                | 214844 | 215161 | 318  |
| hypothetical protein                                | 214525 | 214872 | 348  |
| hypothetical protein                                | 214179 | 214547 | 369  |
| hypothetical protein                                | 213322 | 213891 | 570  |
| hypothetical protein                                | 213000 | 213305 | 306  |
| putative tubulin-like protein                       | 211923 | 212885 | 963  |
| hypothetical protein                                | 211401 | 211589 | 189  |
| hypothetical protein                                | 211026 | 211331 | 306  |
| hypothetical protein                                | 210836 | 211060 | 225  |
| hypothetical protein                                | 209686 | 210420 | 735  |
| hypothetical protein                                | 209525 | 209641 | 117  |
| hypothetical protein                                | 209193 | 209345 | 153  |
| hypothetical protein                                | 208618 | 208815 | 198  |
| hypothetical protein                                | 207682 | 208542 | 861  |
| hypothetical protein                                | 206183 | 207673 | 1491 |
| hypothetical protein                                | 205634 | 206125 | 492  |
| hypothetical protein                                | 205119 | 205625 | 507  |
| hypothetical protein                                | 204958 | 205113 | 156  |
| hypothetical protein                                | 204792 | 204938 | 147  |
| hypothetical protein                                | 204364 | 204795 | 432  |
| hypothetical protein                                | 204050 | 204361 | 312  |
| hypothetical protein                                | 203373 | 204053 | 681  |
| hypothetical protein                                | 202927 | 203370 | 444  |
| putative thymidine kinase                           | 202251 | 202856 | 606  |
| hypothetical protein                                | 201990 | 202205 | 216  |
| hypothetical protein                                | 198365 | 201928 | 3564 |
| hypothetical protein                                | 196731 | 198446 | 1716 |
| hypothetical protein                                | 194135 | 196738 | 2604 |
| hypothetical protein                                | 193251 | 194129 | 879  |
| hypothetical protein                                | 190933 | 193092 | 2160 |
| hypothetical protein                                | 190021 | 190917 | 897  |
| hypothetical protein                                | 189767 | 189961 | 195  |
| hypothetical protein                                | 189312 | 189806 | 495  |
| hypothetical protein                                | 188553 | 189254 | 702  |
| hypothetical protein                                | 188173 | 188451 | 279  |
| hypothetical protein                                | 187659 | 188102 | 444  |
| hypothetical protein                                | 186878 | 187528 | 651  |
| hypothetical protein                                | 185928 | 186791 | 864  |
| hypothetical protein                                | 185188 | 185913 | 726  |
| hypothetical protein                                | 183673 | 185172 | 1500 |
| hypothetical protein                                | 183509 | 183670 | 162  |
| hypothetical protein                                | 182592 | 183509 | 918  |
| putative DNA-directed RNA polymerase subunit beta   | 178391 | 182647 | 4257 |
| putative DNA-directed RNA polymerase subunit beta 2 | 176781 | 178394 | 1614 |
| putative endolysin                                  | 169954 | 176760 | 6807 |
| hypothetical protein                                | 167761 | 169911 | 2151 |
| hypothetical protein                                | 166592 | 167710 | 1119 |
| hypotehtetical protein                              | 166091 | 166519 | 429  |
| hypothetical protein                                | 165526 | 166119 | 594  |
| hypothetical protein                                | 164961 | 165455 | 495  |
| hypothetical protein                                | 164231 | 164929 | 699  |
| hypothetical protein                                | 163793 | 164221 | 429  |
| hypothetical protein                                | 163116 | 163790 | 675  |
| hypothetical protein                                | 162687 | 163109 | 423  |
| hypothetical protein                                | 161231 | 162685 | 1455 |

|                                                                       |        |        |      |
|-----------------------------------------------------------------------|--------|--------|------|
| hypothetical protein                                                  | 160374 | 161171 | 798  |
| hypothetical protein                                                  | 158833 | 160323 | 1491 |
| hypothetical protein                                                  | 158353 | 158766 | 414  |
| hypothetical protein                                                  | 156995 | 158332 | 1338 |
| hypothetical protein                                                  | 156325 | 156984 | 660  |
| hypothetical protein                                                  | 154978 | 156255 | 1278 |
| putative RapA-like RNA polymerase-associated protein                  | 152899 | 154953 | 2055 |
| hypothetical protein                                                  | 152305 | 152847 | 543  |
| hypothetical protein                                                  | 151724 | 152296 | 573  |
| hypothetical protein                                                  | 151411 | 151710 | 300  |
| hypothetical protein                                                  | 151198 | 151404 | 207  |
| hypothetical protein                                                  | 150616 | 151092 | 477  |
| hypothetical protein                                                  | 150012 | 150572 | 561  |
| putative thymidine kinase                                             | 149373 | 149999 | 627  |
| putative HNH endonuclease                                             | 148330 | 149412 | 1083 |
| hypothetical protein                                                  | 148054 | 148311 | 258  |
| putative chaperonin large subunit                                     | 146434 | 148011 | 1578 |
| hypothetical protein                                                  | 145810 | 146343 | 534  |
| hypothetical protein                                                  | 145344 | 145901 | 558  |
| putative helix-turn-helix domain-containing transcriptional regulator | 144908 | 145282 | 375  |
| hypothetical protein                                                  | 144294 | 144818 | 525  |
| hypothetical protein                                                  | 143936 | 144313 | 378  |
| hypothetical protein                                                  | 143508 | 143924 | 417  |
| putative LysM peptidoglycan-binding domain-containing protein         | 143010 | 143492 | 483  |
| hypothetical protein                                                  | 142507 | 142887 | 381  |
| putative thymidylate synthase                                         | 141585 | 142448 | 864  |
| hypothetical protein                                                  | 141135 | 141572 | 438  |
| hypothetical protein                                                  | 140775 | 141131 | 357  |
| hypothetical protein                                                  | 140593 | 140784 | 192  |
| hypothetical protein                                                  | 140192 | 140599 | 408  |
| hypothetical protein                                                  | 139733 | 140182 | 450  |
| hypothetical protein                                                  | 139367 | 139705 | 339  |
| hypothetical protein                                                  | 139078 | 139290 | 213  |
| hypothetical protein                                                  | 138815 | 139081 | 267  |
| hypothetical protein                                                  | 138435 | 138722 | 288  |
| hypothetical protein                                                  | 138250 | 138438 | 189  |
| putative nucleotidyltransferase                                       | 137261 | 138253 | 993  |
| hypothetical protein                                                  | 137016 | 137264 | 249  |
| hypothetical protein                                                  | 136438 | 136899 | 462  |
| hypothetical protein                                                  | 135936 | 136490 | 555  |
| putative chaperone protein                                            | 134688 | 135911 | 1224 |
| hypothetical protein                                                  | 134241 | 134678 | 438  |
| hypothetical protein                                                  | 133587 | 134231 | 645  |
| hypothetical protein                                                  | 133262 | 133636 | 375  |
| hypothetical protein                                                  | 132909 | 133265 | 357  |
| putative serine/threonine protein phosphatase 1                       | 132115 | 132912 | 798  |
| hypothetical protein                                                  | 131683 | 132090 | 408  |
| hypothetical protein                                                  | 131231 | 131659 | 429  |
| hypothetical protein                                                  | 130742 | 131170 | 429  |
| hypothetical protein                                                  | 130176 | 130745 | 570  |
| hypothetical protein                                                  | 129862 | 130182 | 321  |
| putative RNase T-like exonuclease                                     | 129155 | 129829 | 675  |
| hypothetical protein                                                  | 128399 | 129142 | 744  |
| hypothetical protein                                                  | 127955 | 128374 | 420  |
| hypothetical protein                                                  | 127387 | 127965 | 579  |
| hypothetical protein                                                  | 127051 | 127332 | 282  |

|                                                              |        |        |      |
|--------------------------------------------------------------|--------|--------|------|
| putative DNA-binding protein                                 | 126800 | 126976 | 177  |
| hypothetical protein                                         | 125087 | 126799 | 1713 |
| hypothetical protein                                         | 124276 | 125061 | 786  |
| hypothetical protein                                         | 123758 | 124276 | 519  |
| hypothetical protein                                         | 123445 | 123747 | 303  |
| hypothetical protein                                         | 122814 | 123329 | 516  |
| hypothetical protein                                         | 122013 | 122714 | 702  |
| putative PnuC-like nicotinamide mononucleotide transporter   | 121292 | 121987 | 696  |
| putative NadR-like transcriptional regulator                 | 120182 | 121291 | 1110 |
| hypothetical protein                                         | 119553 | 120167 | 615  |
| putative SPFH-domain membrane protein                        | 118674 | 119540 | 867  |
| hypothetical protein                                         | 118333 | 118677 | 345  |
| hypothetical protein                                         | 117996 | 118256 | 261  |
| putative metallo-dependent phosphatase                       | 117460 | 117993 | 534  |
| hypothetical protein                                         | 117134 | 117460 | 327  |
| hypothetical protein                                         | 116800 | 117132 | 333  |
| hypothetical protein                                         | 116455 | 116763 | 309  |
| hypothetical protein                                         | 116207 | 116518 | 312  |
| hypothetical protein                                         | 115916 | 116185 | 270  |
| hypothetical protein                                         | 115674 | 115919 | 246  |
| hypothetical protein                                         | 115204 | 115623 | 420  |
| hypothetical protein                                         | 114620 | 115207 | 588  |
| hypothetical protein                                         | 114163 | 114549 | 387  |
| hypothetical protein                                         | 113850 | 114290 | 441  |
| hypothetical protein                                         | 113012 | 113875 | 864  |
| hypothetical protein                                         | 112466 | 112918 | 453  |
| hypothetical protein                                         | 112203 | 112451 | 249  |
| hypothetical protein                                         | 111781 | 112203 | 423  |
| hypothetical protein                                         | 111502 | 111750 | 249  |
| hypothetical protein                                         | 111253 | 111477 | 225  |
| hypothetical protein                                         | 111041 | 111250 | 210  |
| hypothetical protein                                         | 110769 | 111044 | 276  |
| putative nucleoside triphosphate pyrophosphohydrolase        | 110105 | 110722 | 618  |
| hypothetical protein                                         | 109535 | 110086 | 552  |
| hypothetical protein                                         | 108894 | 109538 | 645  |
| hypothetical protein                                         | 108414 | 108818 | 405  |
| hypothetical protein                                         | 107853 | 108344 | 492  |
| hypothetical protein                                         | 107412 | 107807 | 396  |
| hypothetical protein                                         | 107072 | 107425 | 354  |
| hypothetical protein                                         | 106711 | 107058 | 348  |
| putative secreted protein                                    | 106238 | 106696 | 459  |
| hypothetical protein                                         | 105831 | 106208 | 378  |
| hypothetical protein                                         | 105412 | 105804 | 393  |
| hypothetical protein                                         | 104926 | 105402 | 477  |
| hypothetical protein                                         | 104569 | 104883 | 315  |
| hypothetical protein                                         | 104101 | 104556 | 456  |
| putative S-adenosyl-L-methionine-dependent methyltransferase | 103378 | 104073 | 696  |
| hypothetical protein                                         | 102952 | 103368 | 417  |
| hypothetical protein                                         | 101881 | 102756 | 876  |
| hypothetical protein                                         | 101430 | 101795 | 366  |
| hypothetical protein                                         | 100875 | 101402 | 528  |
| hypothetical protein                                         | 100416 | 100850 | 435  |
| hypothetical protein                                         | 99984  | 100391 | 408  |
| hypothetical protein                                         | 99254  | 99928  | 675  |
| hypothetical protein                                         | 98911  | 99354  | 444  |
| putative dihydrofolate reductase                             | 98388  | 98909  | 522  |

|                                                         |       |       |      |
|---------------------------------------------------------|-------|-------|------|
| hypothetical protein                                    | 97537 | 98391 | 855  |
| hypothetical protein                                    | 97264 | 97518 | 255  |
| hypothetical protein                                    | 96756 | 97304 | 549  |
| hypothetical protein                                    | 96260 | 96763 | 504  |
| hypothetical protein                                    | 95928 | 96233 | 306  |
| hypothetical protein                                    | 95723 | 95941 | 219  |
| hypothetical protein                                    | 95164 | 95730 | 567  |
| hypothetical protein                                    | 94963 | 95151 | 189  |
| putative rossmann fold-containing protein               | 93989 | 94912 | 924  |
| hypothetical protein                                    | 93539 | 93937 | 399  |
| hypothetical protein                                    | 93339 | 93614 | 276  |
| putative tail fiber protein                             | 90655 | 93225 | 2571 |
| hypothetical protein                                    | 89811 | 90608 | 798  |
| hypothetical protein                                    | 89243 | 89710 | 468  |
| putative PhoH domain protein                            | 88379 | 89152 | 774  |
| hypothetical protein                                    | 86542 | 88311 | 1770 |
| hypothetical protein                                    | 84750 | 86480 | 1731 |
| putative phage non-contractile tail fiber protein       | 82822 | 84711 | 1890 |
| hypothetical protein                                    | 80555 | 82696 | 2142 |
| hypothetical protein                                    | 78681 | 80441 | 1761 |
| hypothetical protein                                    | 76611 | 78665 | 2055 |
| putative tailspike protein                              | 74158 | 76299 | 2142 |
| putative tail fiber protein                             | 72196 | 74076 | 1881 |
| hypothetical protein                                    | 71693 | 72046 | 354  |
| hypothetical protein                                    | 71134 | 71661 | 528  |
| hypothetical protein                                    | 70716 | 71102 | 387  |
| hypothetical protein                                    | 70420 | 70734 | 315  |
| hypothetical protein                                    | 70049 | 70423 | 375  |
| hypothetical protein                                    | 69297 | 70052 | 756  |
| hypothetical protein                                    | 68871 | 69251 | 381  |
| putative acyl-CoA N-acyltransferase                     | 68379 | 68846 | 468  |
| hypothetical protein                                    | 68098 | 68379 | 282  |
| hypothetical protein                                    | 67709 | 68029 | 321  |
| hypothetical protein                                    | 67239 | 67667 | 429  |
| putative RNA ligase                                     | 66758 | 67225 | 468  |
| hypothetical protein                                    | 66645 | 66761 | 117  |
| hypothetical protein                                    | 65933 | 66268 | 336  |
| hypothetical protein                                    | 65821 | 65925 | 105  |
| hypothetical protein                                    | 64939 | 65817 | 879  |
| hypothetical protein                                    | 64613 | 64849 | 237  |
| hypothetical protein                                    | 64040 | 64534 | 495  |
| ATP-dependent protease                                  | 62636 | 63976 | 1341 |
| ribonuclease                                            | 62112 | 62633 | 522  |
| hypothetical protein                                    | 61454 | 62059 | 606  |
| hypothetical protein                                    | 60158 | 61450 | 1293 |
| hypothetical protein                                    | 59831 | 60157 | 327  |
| putative DNA ligase                                     | 57916 | 59820 | 1905 |
| putative HAD-like superfamily domain containing protein | 57211 | 57837 | 627  |
| hypothetical protein                                    | 56732 | 57202 | 471  |
| hypothetical protein                                    | 56302 | 56712 | 411  |
| hypothetical protein                                    | 55985 | 56242 | 258  |
| putative lytic transglycosylase                         | 55226 | 55894 | 669  |
| hypothetical protein                                    | 54851 | 55135 | 285  |
| putative nucleoside triphosphate hydrolase              | 52282 | 54846 | 2565 |
| hypothetical protein                                    | 51335 | 52321 | 987  |
| hypothetical protein                                    | 48072 | 51287 | 3216 |

|                                      |       |       |      |
|--------------------------------------|-------|-------|------|
| hypothetical protein                 | 44514 | 48026 | 3513 |
| hypothetical protein                 | 40819 | 44466 | 3648 |
| hypothetical protein                 | 40486 | 40749 | 264  |
| putative tail fiber protein          | 37669 | 40476 | 2808 |
| putative structural protein          | 36371 | 37633 | 1263 |
| putative i-spanin                    | 35967 | 36359 | 393  |
| putative o-spanin                    | 35567 | 36100 | 534  |
| hypothetical protein                 | 35020 | 35514 | 495  |
| hypothetical protein                 | 34518 | 35117 | 600  |
| hypothetical protein                 | 33895 | 34542 | 648  |
| hypothetical protein                 | 32900 | 33883 | 984  |
| hypothetical protein                 | 32559 | 32966 | 408  |
| hypothetical protein                 | 30465 | 32552 | 2088 |
| hypothetical protein                 | 27470 | 30439 | 2970 |
| hypothetical protein                 | 27016 | 27411 | 396  |
| hypothetical protein                 | 26555 | 26947 | 393  |
| hypothetical protein                 | 25919 | 26491 | 573  |
| hypothetical protein                 | 25141 | 25776 | 636  |
| hypothetical protein                 | 22639 | 25032 | 2394 |
| hypothetical protein                 | 20972 | 22642 | 1671 |
| hypothetical protein                 | 19938 | 20960 | 1023 |
| hypothetical protein                 | 17572 | 19758 | 2187 |
| hypothetical protein                 | 16926 | 17483 | 558  |
| hypothetical protein                 | 14809 | 15315 | 507  |
| hypothetical protein                 | 13423 | 14769 | 1347 |
| hypothetical protein                 | 12764 | 13426 | 663  |
| hypothetical protein                 | 11466 | 12761 | 1296 |
| hypothetical protein                 | 9948  | 11462 | 1515 |
| hypothetical protein                 | 9090  | 9878  | 789  |
| hypothetical protein                 | 7743  | 9083  | 1341 |
| hypothetical protein                 | 7346  | 7756  | 411  |
| hypothetical protein                 | 6246  | 7337  | 1092 |
| hypothetical protein                 | 4920  | 6185  | 1266 |
| hypothetical protein                 | 3908  | 4882  | 975  |
| putative internal capsid protein     | 2604  | 3899  | 1296 |
| hypothetical protein                 | 2096  | 2611  | 516  |
| hypothetical protein                 | 1209  | 2084  | 876  |
| putative capsid and scaffold protein | 1     | 1209  | 1209 |

Table S3: Production of Interleukin 6

|    | Treatment                       | n  | Minimum  | 25th Percentile | Median   | 75th percentile | Maximum  |
|----|---------------------------------|----|----------|-----------------|----------|-----------------|----------|
| 1  | PBS (WT)                        | 24 | 0.004683 | 0.081714        | 0.321699 | 0.863936        | 1.508449 |
| 2  | Purified KPN7 (WT)              | 12 | 0.053838 | 0.247007        | 0.346057 | 0.530594        | 4.25139  |
| 3  | Purified KPN8 (WT)              | 11 | 0.008165 | 0.100662        | 0.231325 | 0.652846        | 1.444081 |
| 4  | LPS (WT)                        | 48 | 318.0439 | 356.5376        | 388.132  | 443.0246        | 563.3722 |
| 5  | Crude KPN7 (WT)                 | 12 | 326.6528 | 370.7319        | 410.9947 | 456.1789        | 586.4728 |
| 6  | Crude KPN8 (WT)                 | 12 | 302.2242 | 344.0396        | 388.6336 | 438.9652        | 576.2055 |
| 7  | PBS (IRAK3 Knockdown)           | 36 | 0.023252 | 0.064068        | 0.740428 | 0.821181        | 2.302732 |
| 8  | Purified KPN7 (IRAK3 Knockdown) | 6  | 0.001186 | 0.007536        | 0.044238 | 0.090391        | 0.167574 |
| 9  | Purified KPN8 (IRAK3 Knockdown) | 5  | 3.95E-05 | 0.001215        | 0.019774 | 0.029868        | 0.035626 |
| 10 | LPS (IRAK3 Knockdown)           | 60 | 300.8543 | 442.9702        | 512.3772 | 667.7775        | 714.1284 |
| 11 | Crude KPN7 (IRAK3 Knockdown)    | 6  | 600.918  | 677.143         | 698.4566 | 729.2409        | 735.9357 |
| 12 | Crude KPN8 (IRAK3 Knockdown)    | 8  | 225.4606 | 347.4249        | 668.4639 | 704.1381        | 722.3294 |
| 13 | PBS (IRAK3 Knockout)            | 28 | 0.42395  | 1.216423        | 1.93387  | 2.810114        | 2.810114 |
| 14 | Purified KPN7 (IRAK3 Knockout)  | 6  | 0.001186 | 0.006875        | 1.096033 | 2.219724        | 2.286655 |
| 15 | Purified KPN8 (IRAK3 Knockout)  | 7  | 0.00628  | 0.029254        | 0.05238  | 0.077644        | 0.188672 |
| 16 | LPS (IRAK3 Knockout)            | 36 | 401.4144 | 556.7049        | 598.1317 | 652.4113        | 667.2087 |
| 17 | Crude KPN7 (IRAK3 Knockout)     | 6  | 500.2721 | 619.7632        | 658.0342 | 698.0275        | 741.1082 |
| 18 | Crude KPN8 (IRAK3 Knockout)     | 7  | 524.4332 | 553.0358        | 579.8908 | 671.0924        | 710.4177 |

Table S4: Production of Tumour Necrosis Factor – alpha

|    | Treatment                       | n  | Minimum  | 25th percentile | Median   | 75th percentile | Maximum  |
|----|---------------------------------|----|----------|-----------------|----------|-----------------|----------|
| 1  | PBS (WT)                        | 8  | 0.001923 | 0.001923        | 0.018633 | 0.035343        | 0.035343 |
| 2  | Purified KPN7 (WT)              | 8  | 0.004982 | 0.014155        | 0.023571 | 0.057764        | 0.168983 |
| 3  | Purified KPN8 (WT)              | 6  | 0.847649 | 1.103309        | 1.438531 | 1.669659        | 1.787398 |
| 4  | LPS (WT)                        | 48 | 125.3497 | 131.2878        | 144.6694 | 154.3615        | 174.4363 |
| 5  | Crude KPN7 (WT)                 | 12 | 88.55341 | 93.10092        | 97.19952 | 108.1864        | 113.8395 |
| 6  | Crude KPN8 (WT)                 | 9  | 40.22049 | 41.3014         | 44.76724 | 46.45769        | 49.57528 |
| 7  | PBS (IRAK3 Knockdown)           | 16 | 0.91773  | 0.9198          | 2.748813 | 4.651696        | 4.875372 |
| 8  | Purified KPN7 (IRAK3 Knockdown) | 4  | 0.174986 | 0.260158        | 0.928372 | 1.608419        | 1.729091 |
| 9  | Purified KPN8 (IRAK3 Knockdown) | 4  | 5.780675 | 5.867561        | 5.930849 | 5.977227        | 6.013384 |
| 10 | LPS (IRAK3 Knockdown)           | 24 | 145.3778 | 148.5422        | 161.6254 | 166.9083        | 169.8639 |
| 11 | Crude KPN7 (IRAK3 Knockdown)    | 6  | 251.2843 | 277.4774        | 291.9919 | 305.8648        | 331.2531 |
| 12 | Crude KPN8 (IRAK3 Knockdown)    | 14 | 178.3251 | 225.0582        | 268.2506 | 394.5462        | 412.6336 |
| 13 | PBS (IRAK3 Knockout)            | 16 | 5.832262 | 6.132885        | 6.654626 | 7.093746        | 7.146505 |
| 14 | Purified KPN7 (IRAK3 Knockout)  | 4  | 5.700684 | 5.797821        | 11.37101 | 16.94528        | 17.04569 |
| 15 | Purified KPN8 (IRAK3 Knockout)  | 6  | 1.505104 | 2.40468         | 4.560822 | 5.776204        | 6.438981 |
| 16 | LPS (IRAK3 Knockout)            | 24 | 414.1599 | 422.6707        | 432.1394 | 438.7443        | 447.9709 |
| 17 | Crude KPN7 (IRAK3 Knockout)     | 6  | 170.8852 | 188.566         | 192.3809 | 212.4994        | 228.836  |
| 18 | Crude KPN8 (IRAK3 Knockout)     | 9  | 301.4171 | 305.905         | 382.9372 | 389.6463        | 390.2127 |
